# Supplementary material for: Determination of the geographical origin and ethanol content of Brazilian sugarcane spirit using near-infrared spectroscopy coupled with discriminant analysis
Source: Royal Society of Chemistry journal article supplement (doi:10.1039/c6ay01325b), 2016-01-01
Supplement: c6ay01325b1.pdf [file c6ay01325b1.pdf]

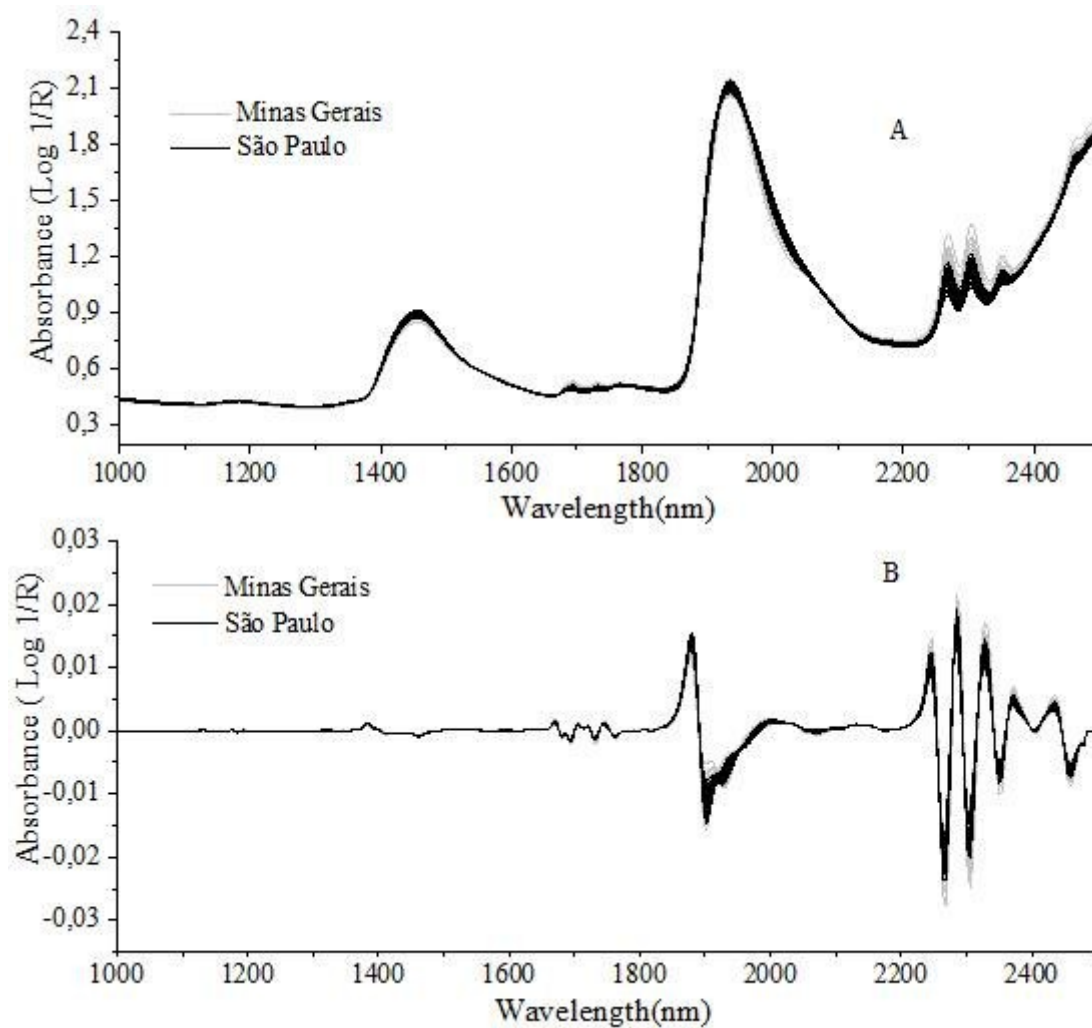

**Supplementary material 1.** NIR spectra of sugarcane aguardente and cachaça from São Paulo and Minas Gerais States pre-processed with MSC (A). NIR spectra pre-processed with 2<sup>nd</sup>D SG (B).

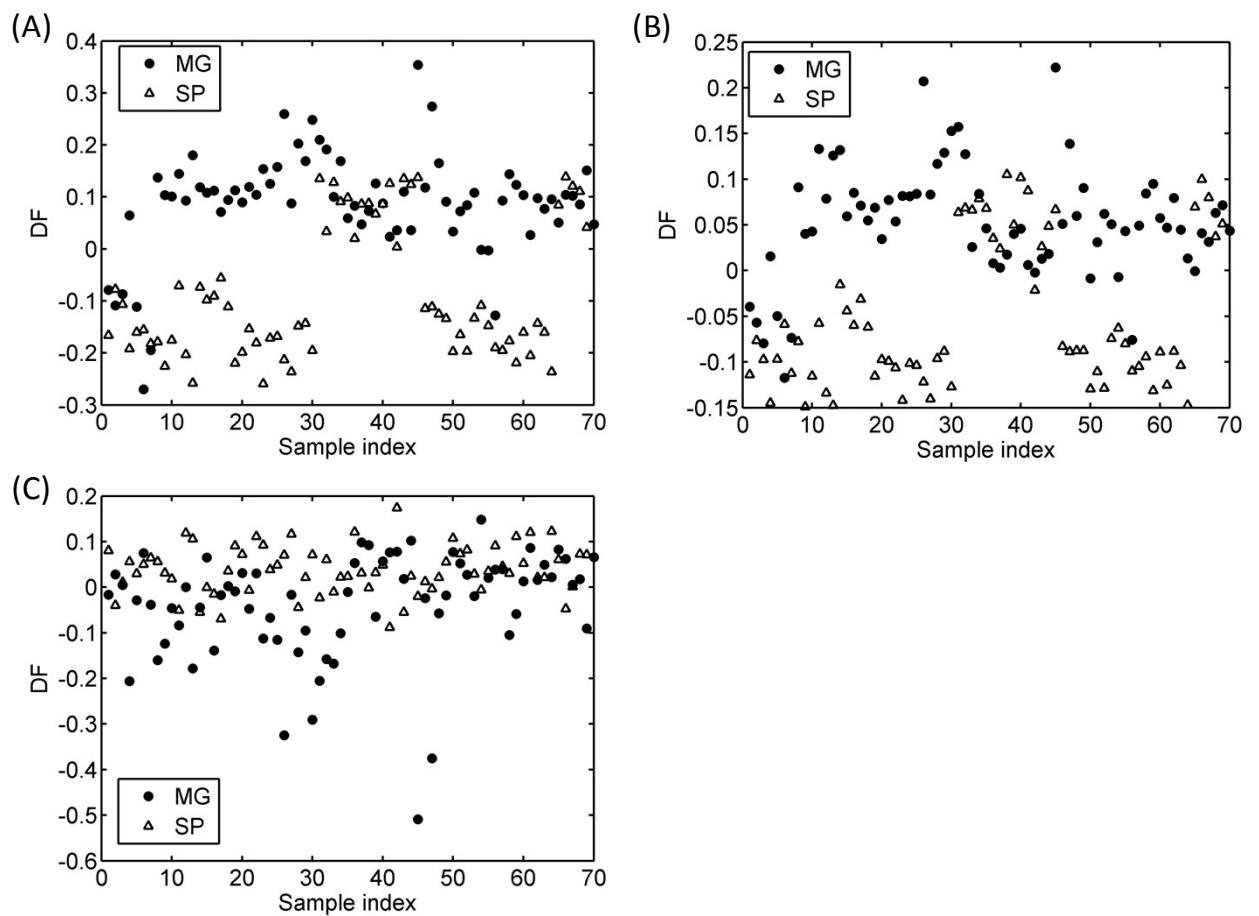

**Supplementary material 2.** Discriminant function x samples index calculated by using the PCA-LDA model for sugarcane aguardente from São Paulo ( $\Delta$ ) and Minas Gerais States ( $\bullet$ ) using: (A) without pre-processing; (B) MSC; (C) second derivative Savitzky-Golay.

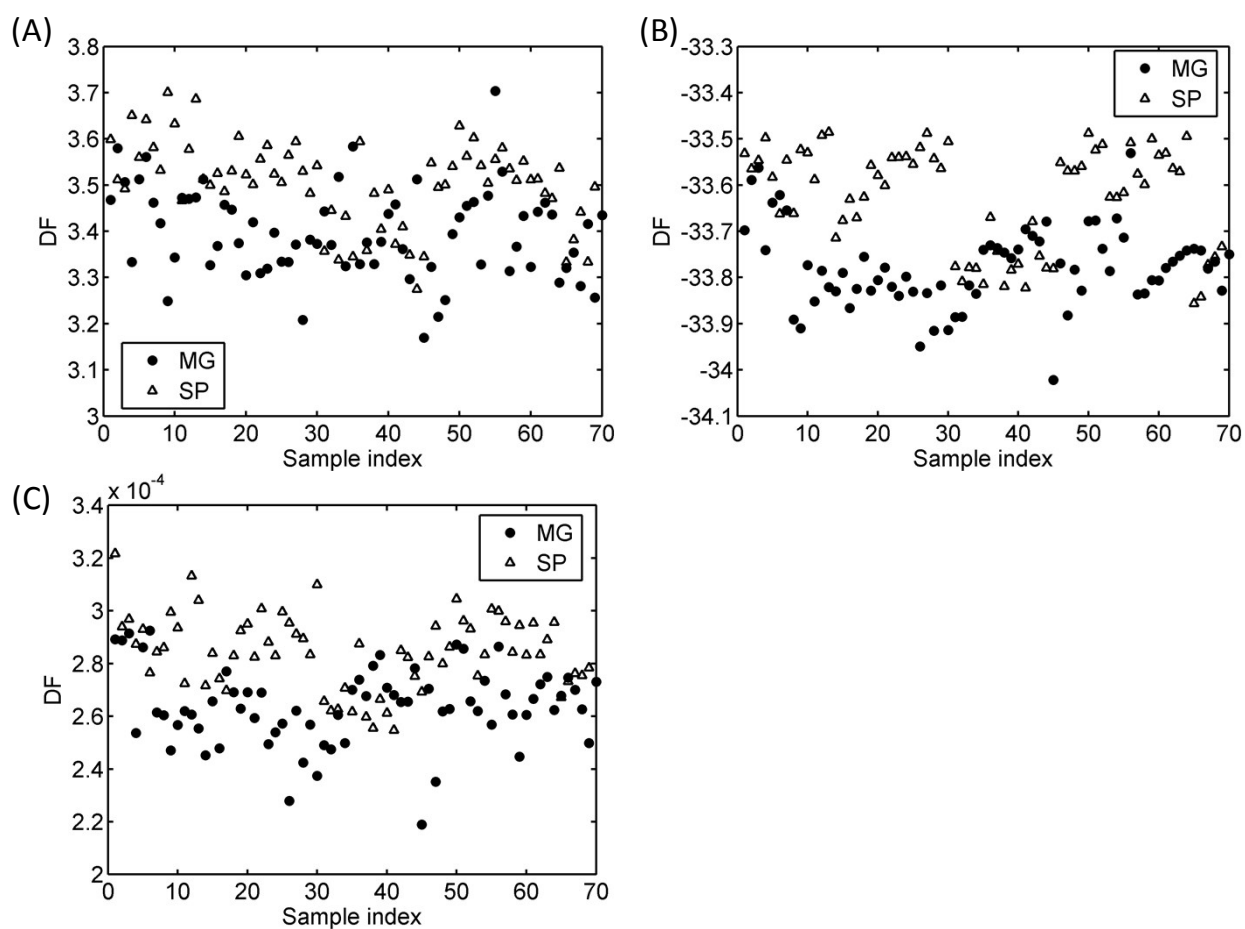

**Supplementary material 3.** Discriminant function x samples index calculated by using the SPA-LDA model for sugarcane aguardente from São Paulo ( $\Delta$ ) and Minas Gerais States ( $\bullet$ ) using: (A) without pre-processing; (B) MSC; (C) second derivative Savitzky-Golay.
